# Supplementary material
Source: MDPI journal article supplement (https://www.mdpi.com/2673-9410/1/2/7)
Supplement: s1 [file s1]

## 10 Supplementary materials

### Text.doc S1

#### **Sustainable solutions for Sargassum inundations in Turks & Caicos 2019-2021**

The Department of Environment and Coastal Resources (DECR) and the University of Greenwich are working together on this Darwin+ project to find out more about the Sargassum – the brown or orange mats of seaweed that have been washing up on our beaches and in TCI waters.

We would be grateful if you would help by answering the following questions:

Q1 Has Sargassum had an impact on your business? YES NO

Q2 If it has had an impact was this LOW MODERATE HIGH

Q3 Do you have any further information? (e.g., when this happened, amounts, customer comments)

Q4 When did you first notice Sargassum?

Q5 Are you taking any action such as removing Sargassum? YES NO (if no please go to Q9)

Q6 If you are removing it how is this done?

How often? daily weekly monthly other

Q8 Do you keep a record? YES NO

Q9 We would love to hear about any sightings in future – it could really help with this project

Please send a photo, date and location to +44 7791 119882 and/or email [environment@gov.tc](mailto:environment@gov.tc)

| Name | Type of business | Date |
|------|------------------|------|
|      |                  |      |

**Middle Creek Cay End**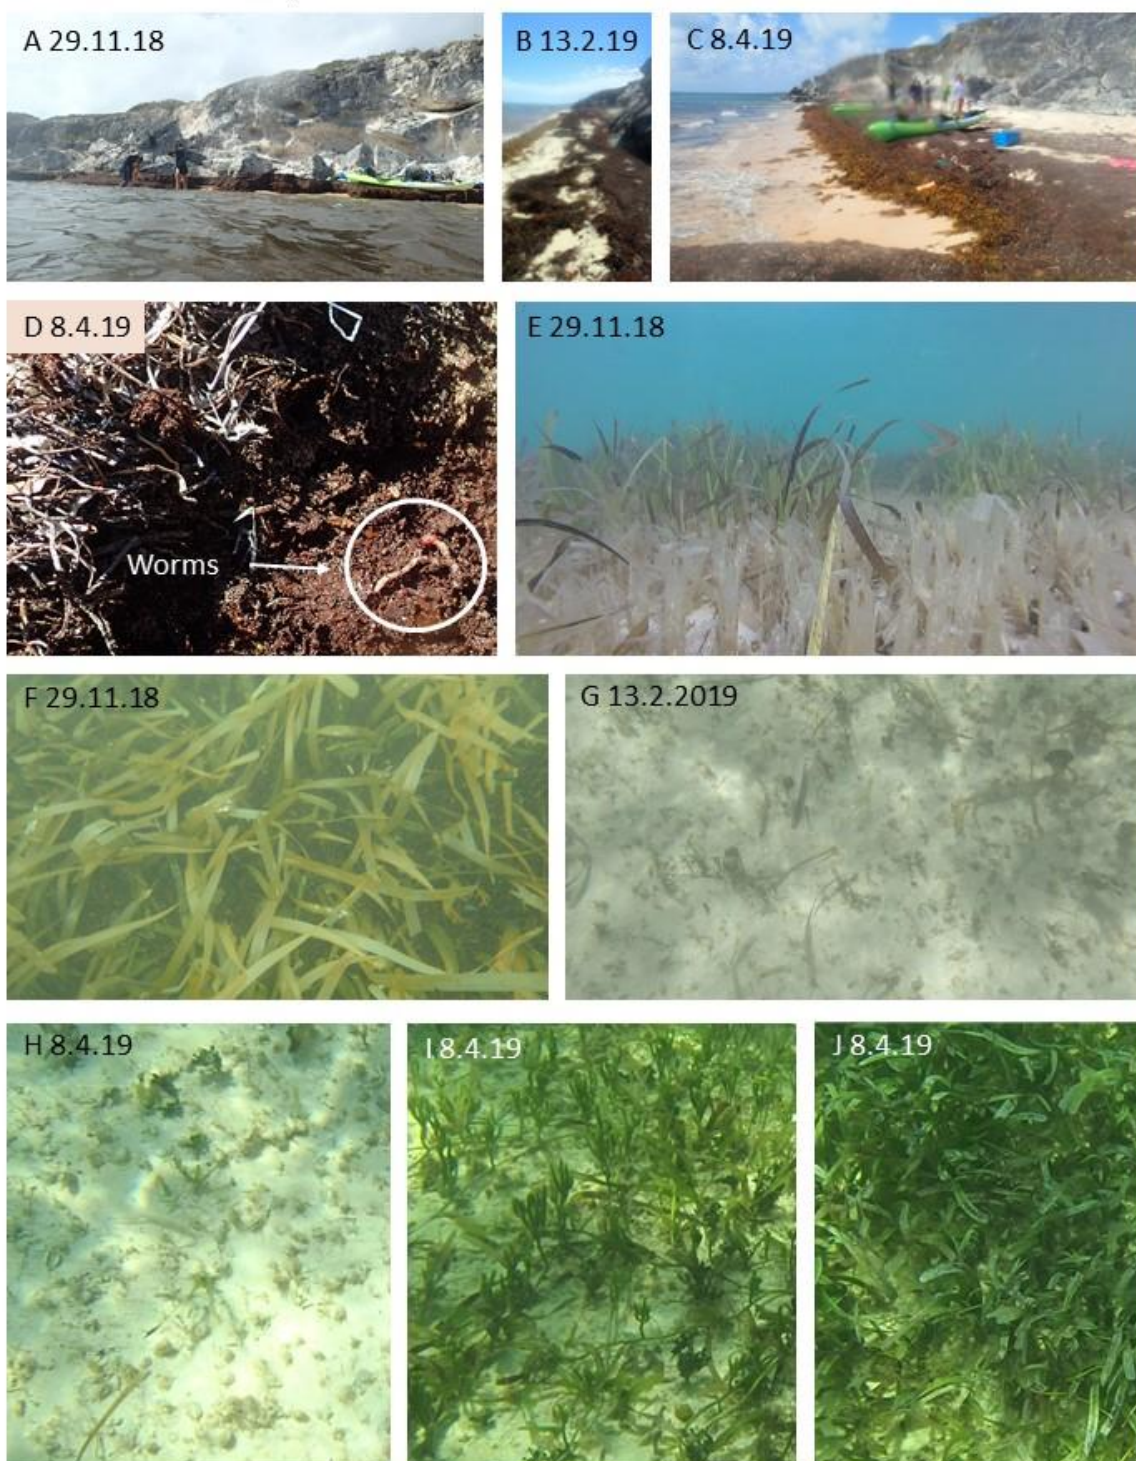

## Middle Creek Cay Middle

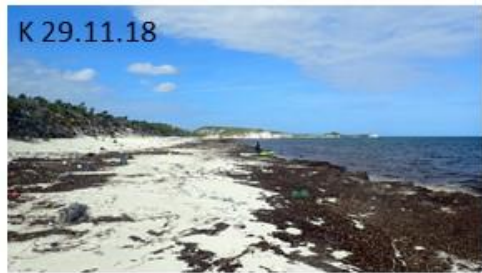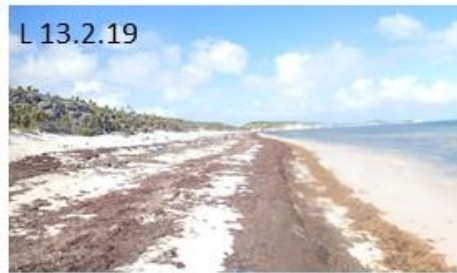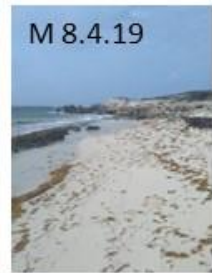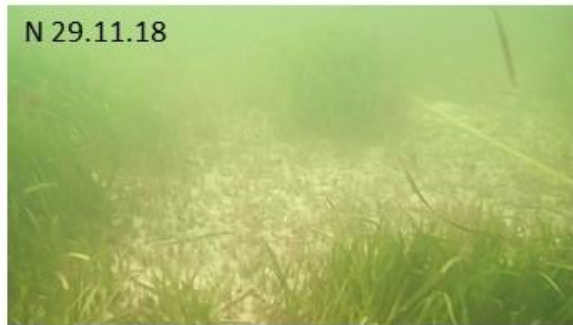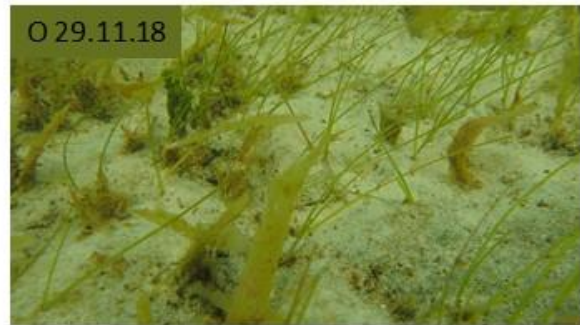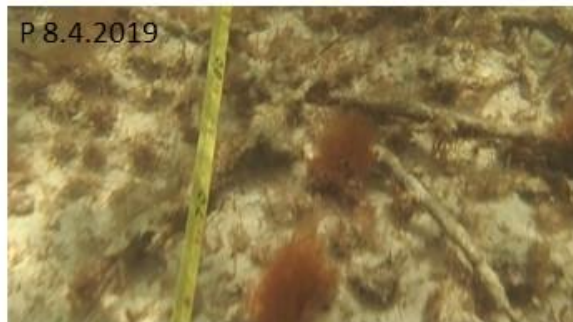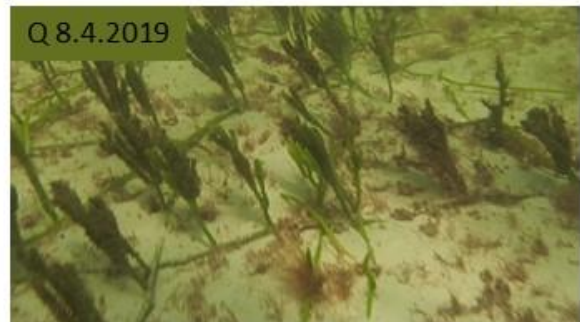

## Middle Creek Cay Tip

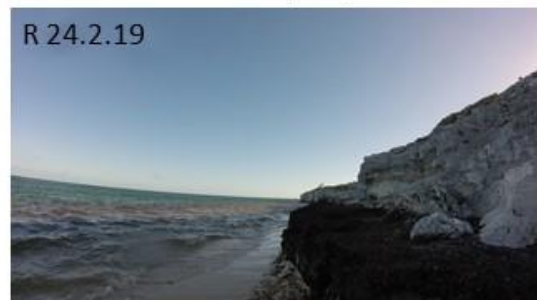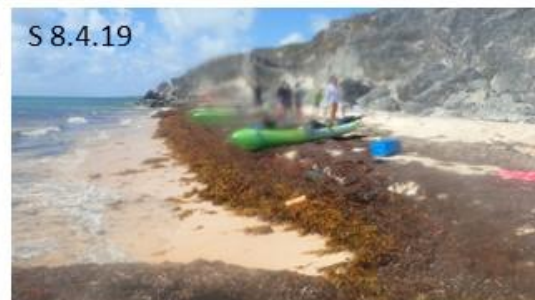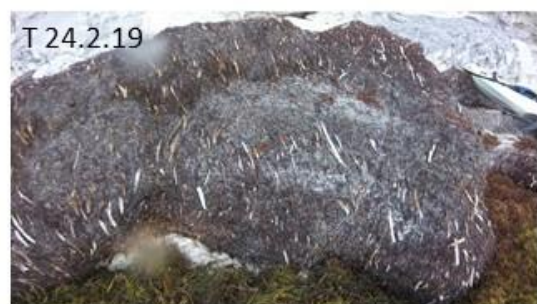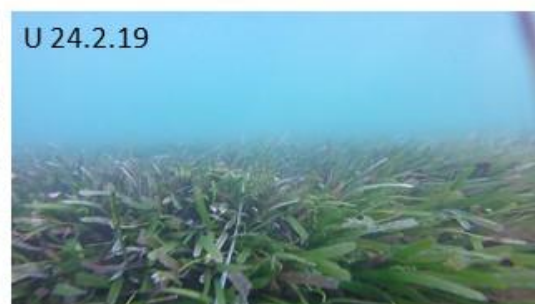

## Coast Guard

V 20.11.19

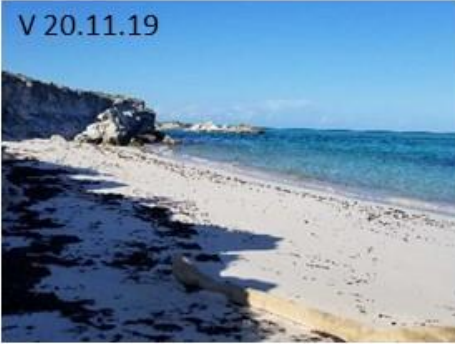

## Long Bay Beach North

W 5.11.18

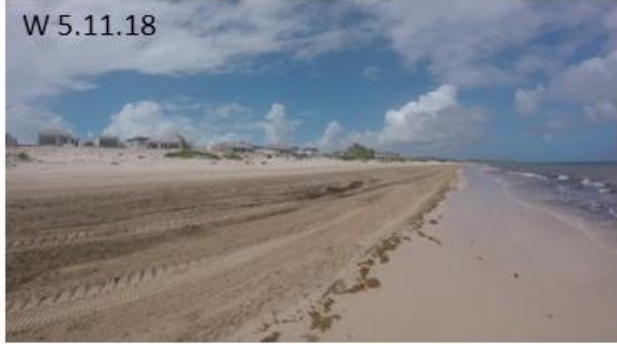

X 5.11.18

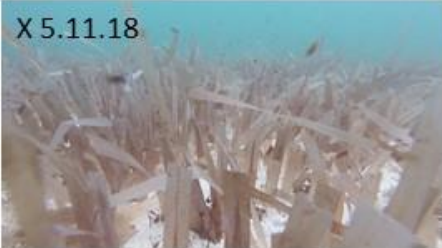

Y 5.11.18

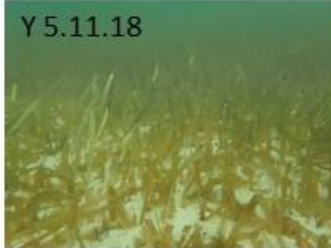

Z 5.11.18

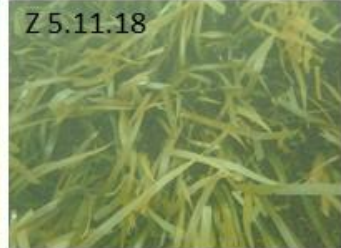

a 5.11.18

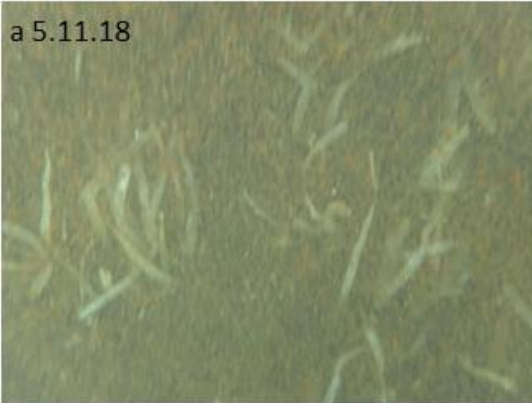

b 2.3.19

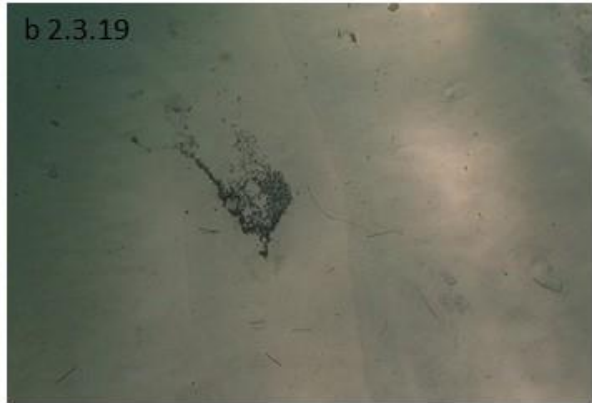

c 2.3.19

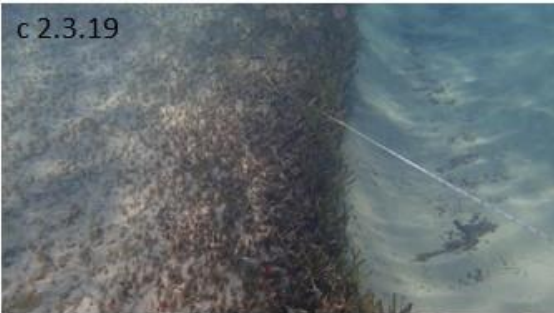

d 2.3.19

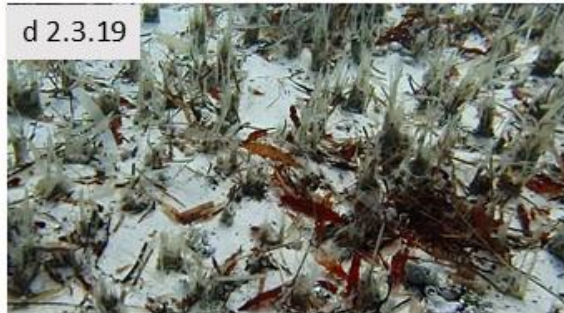

## Long Bay Beach South

d 5.11.18

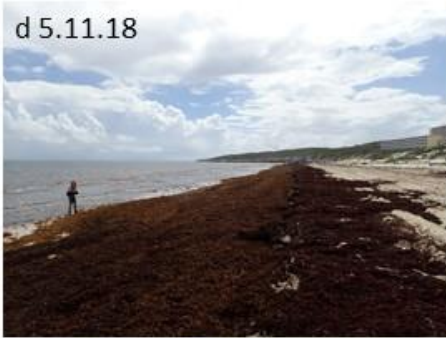

e 5.11.18

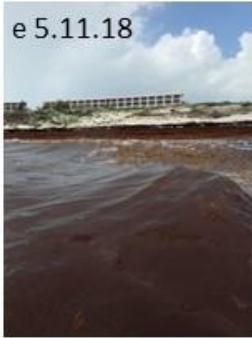

f 5.11.18

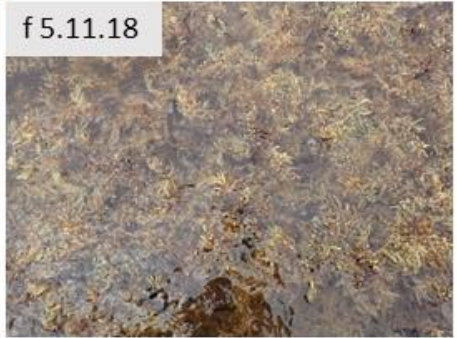

g 5.11.18

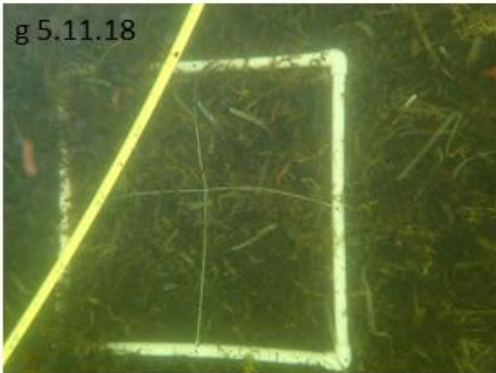

h 2.3.19

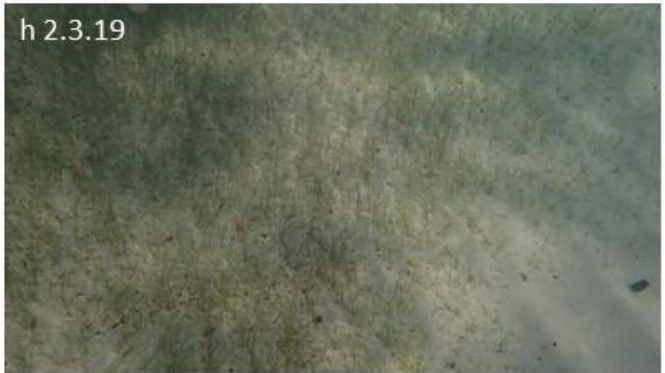

i 2.3.19

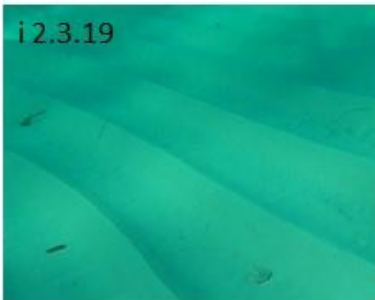

j 2.3.19

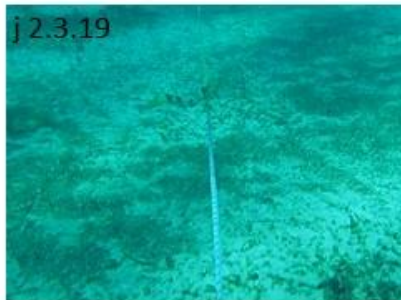

k 2.3.19

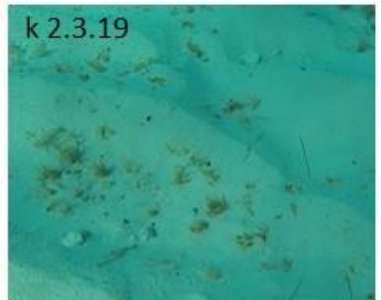

## Highland House

l 11.4.19

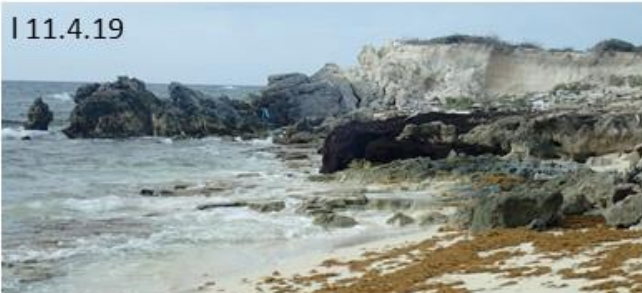

m 18.11.19

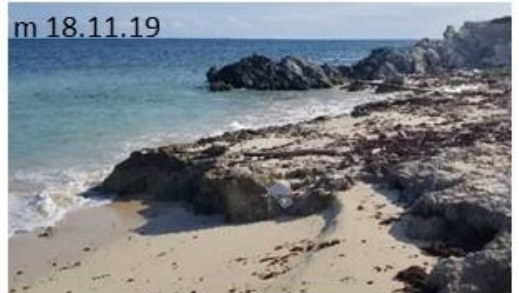

## East of Shark Bay

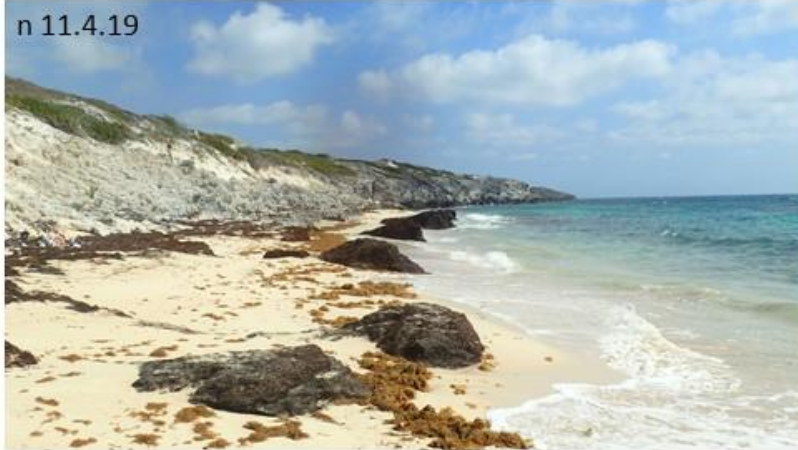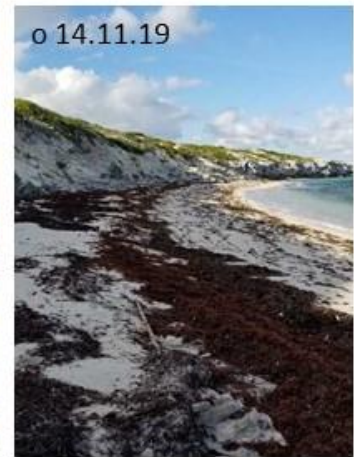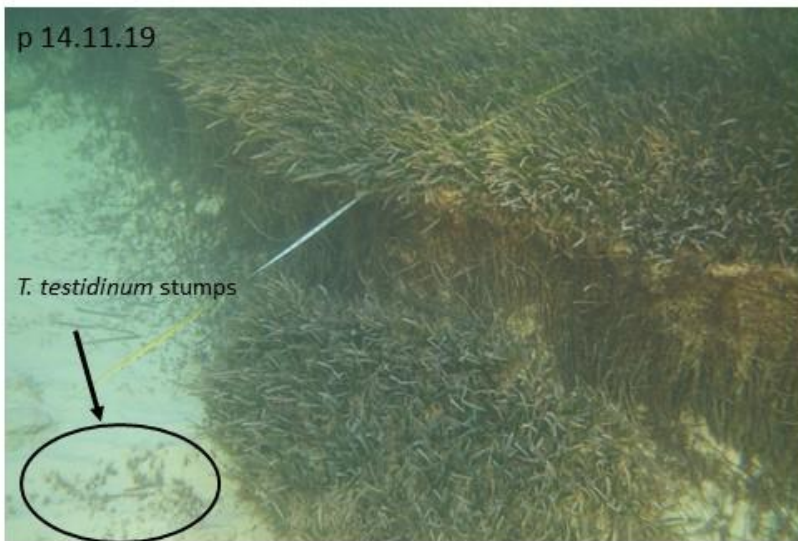

## Shark Bay

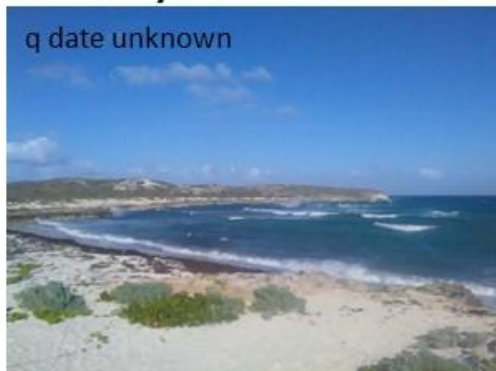

## East Bay

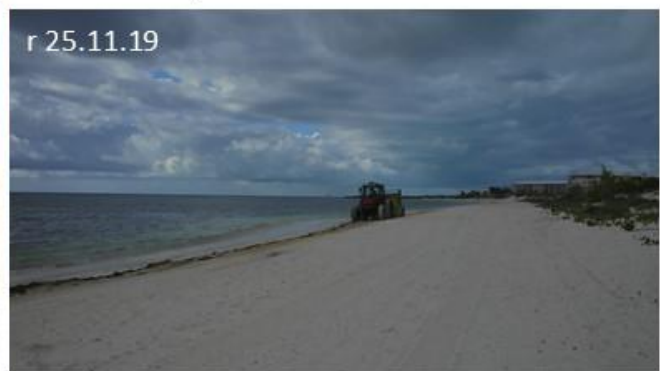

Sargassum loads and benthic composition over time. The ten research sites on South Caicos and adjacent Middle Creek Cay are shown here. For each site, pictures show the Sargassum accumulation on the beach as well as the state of the seagrass bed at different time points, these pictures are labelled with capital and non-capital letters as well as the date taken.

### Video S1

Close up video of Sargassum and seagrass accumulation at Middle Creek Cay Tip from the 24.2.2019. In this video the composition and height of the accumulation can be seen.

**Video S2**

Video taken at Long Bay Beach South on 5.11.2018 showing the depth of the beach accumulation as well as the surf water that is colored brown by particulate organic Sargassum matter.
